# Supplementary material for: Sunlight exposure and cardiovascular risk factors in the REGARDS study: a cross-sectional split-sample analysis
Source: BMC Neurol. 2014 Jun 19;14:133. doi: 10.1186/1471-2377-14-133 (PMC4075775; doi:10.1186/1471-2377-14-133)
Supplement: Additional file 2: Table S2 — Hazard ratios (95% confidence intervals) for dyslipidemia associated with residential insolation exposure in exploratory and confirmatory analyses, by kidney impairment; Provides a table examining the interaction between low insolation exposure and kidney impairment on dyslipidemia. [file 1471-2377-14-133-S2.csv]

Additional file 2: Table S2: Hazard ratios (95% confidence intervals) for dyslipidemia associated with residential insolation exposure in exploratory and confirmatory analyses, by kidney impairment
	No kidney impairment	Kidney impairment	p-value
Low insolation exposure
<5th vs >5th percentile
Exploratory analyses - Unadjusted	1.2 (1.0, 1.4)	0.5 (0.2, 1.0)	0.0168
Exploratory analyses � Fully adjusted	1.3 (1.0, 1.6)	0.5 (0.2, 1.0)	0.0129
Confirmatory analyses - Unadjusted	0.8 (0.7, 1.0)	1.2 (0.6, 2.5)	0.2726
Confirmatory analyses � Fully adjusted	0.8 (0.6, 1.0)	1.3 (0.6, 2.7)	0.1915
Fully adjusted models are adjusted for temperature, age, race, region, gender, education, income, vitamin D intake, , alcohol use, smoking, and body mass index.
Models were adjusted for temperature exposures using a cutoff at the 5th percentile.
