# Supplementary material for: Sunlight exposure and cardiovascular risk factors in the REGARDS study: a cross-sectional split-sample analysis
Source: BMC Neurol. 2014 Jun 19;14:133. doi: 10.1186/1471-2377-14-133 (PMC4075775; doi:10.1186/1471-2377-14-133)
Supplement: Additional file 3: Table S3 — Hazard ratios (95% confidence intervals) for high C-reactive protein associated with residential insolation exposure in exploratory and confirmatory analyses, by kidney impairment; Provides a table examining the interaction between quartiles of insolation exposure and kidney impairment on high CRP. [file 1471-2377-14-133-S3.csv]

Additional file 3: Table S3: Hazard ratios (95% confidence intervals) for high C-reactive protein associated with residential insolation exposure in exploratory and confirmatory analyses, by kidney impairment
	No kidney impairment	Kidney impairment	p-value
Quartiles of insolatioin exposure
Exploratory analyses – Unadjusted			0.0297
1st vs 4th quartile	0.8 (0.7, 0.9)	1.5 (1.0, 2.3)
2nd vs 4th quartile	1.0 (0.9, 1.2)	1.7 (1.1, 2.6)
3rd vs 4th quartile	1.1 (1.0, 1.3)	1.3 (0.8, 1.9)
Exploratory analyses – Fully adjusted			0.1179
1st vs 4th quartile	1.0 (0.8, 1.2)	1.7 (1.1, 2.7)
2nd vs 4th quartile	1.2 (1.0, 1.4)	1.7 (1.1, 2.7)
3rd vs 4th quartile	1.1 (0.9, 1.3)	1.3 (0.8, 2.0)
Confirmatory analyses – Unadjusted			0.0731
1st vs 4th quartile	0.9 (0.8, 1.1)	1.3 (0.8, 1.9)
2nd vs 4th quartile	1.0 (0.9, 1.1)	1.3 (0.8, 1.9)
3rd vs 4th quartile	1.1 (1.0, 1.3)	0.9 (0.6, 1.4)
Confirmatory analyses – Fully adjusted			0.1208
1st vs 4th quartile	1.5 (0.9, 2.4)	1.1 (0.9, 1.4)
2nd vs 4th quartile	1.1 (0.7, 1.8)	1.0 (0.8, 1.2)
3rd vs 4th quartile	0.8 (0.5, 1.3)	1.0 (0.9, 1.2)
Fully adjusted models are adjusted for temperature, age, race, region, gender, education, income, vitamin D intake, , alcohol use, smoking, and body mass index.
Models were adjusted for temperature exposure categorized into quartiles.
